# Supplementary material
Source: publisher figshare collection journal article supplement (https://acs.figshare.com/ndownloader/files/14480492)
Supplement: Supplementary file 1 [file 14480492]

## Supporting Information

### Droplet microarray on patterned butterfly wing surfaces for cell spheroid culture

Changmin Shao<sup>†</sup>, Yuxiao Liu<sup>†</sup>, Junjie Chi, Zhuoyue Chen, Jie Wang, Yuanjin Zhao\*

State Key Laboratory of Bioelectronics, School of Biological Science and Medical Engineering,  
Southeast University, Nanjing 210096, China

Email: yjzhao@seu.edu.cn

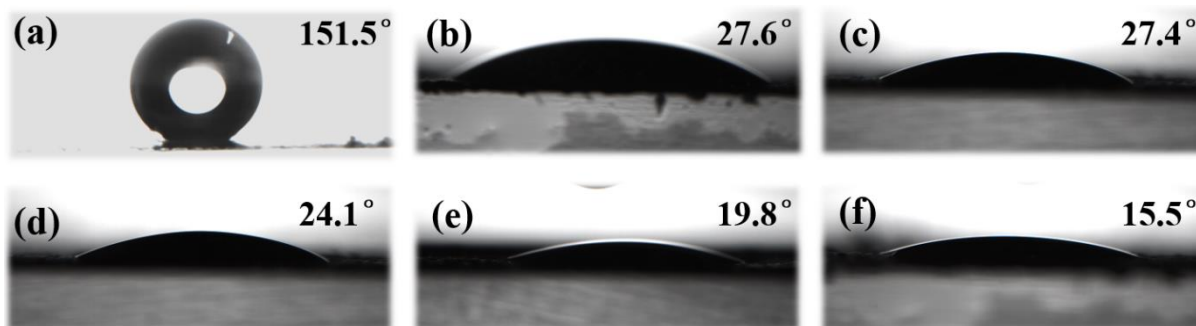

**Figure S1.** (a) Water-contact-angle measurements for the natural wing; (b-f) PEGDA-covered wing with PEGDA hydrogel concentration of 10%、20%、30%、40% and 50%, respectively.

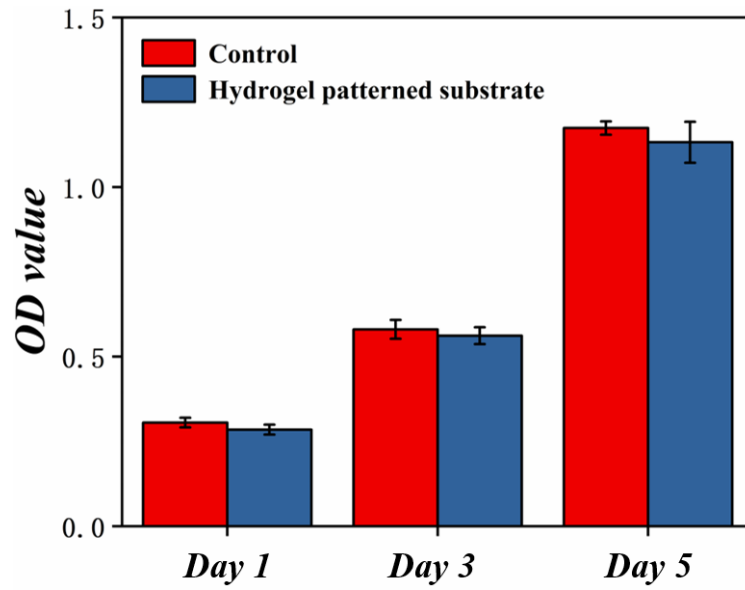

**Figure S2.** The biocompatibility of the hydrogel patterned substrate.

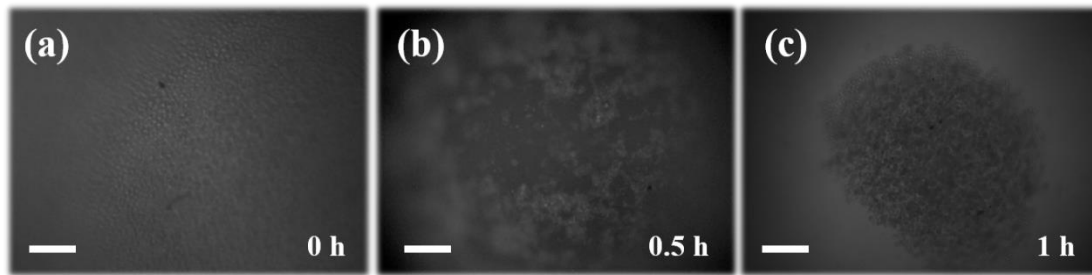

**Figure S3. (a-c)** Human hepatocarcinoma cell (HepG2) aggregation process in one droplet hanging on the hydrogel pattern after 0, 0.5, and 1 hour respectively. The scale bars in a-c are 100  $\mu\text{m}$ .
